# Supplementary material for: Targeted Exome Sequencing Provided Comprehensive Genetic Diagnosis of Congenital Anomalies of the Kidney and Urinary Tract
Source: PubMed Central journal article supplement (PMC7141392; doi:10.3390/jcm9030751), 2020-03-10
Supplement: jcm-09-00751-s001.pdf [file jcm-09-00751-s001.pdf]

# Supplementary Material: Targeted Exome Sequencing Provided Comprehensive Genetic Diagnosis of Congenital Anomalies of the Kidney and Urinary Tract

Yo Han Ahn <sup>1,2,†</sup>, Chung Lee <sup>3,4,†</sup>, Nayoung K. D. Kim <sup>3</sup>, Eujin Park <sup>1,5</sup>, Hee Gyung Kang <sup>1,2,6,\*</sup>, Il-Soo Ha <sup>1,2,6</sup>, Woong-Yang Park <sup>3,4,7</sup> and Hae Il Cheong <sup>1,2,6</sup>

S. Table 1. The 60 genes included in the gene panel design.

| Gene          | MIM gene ID | Inheritance | Renal phenotype                                                                  | Reference |
|---------------|-------------|-------------|----------------------------------------------------------------------------------|-----------|
| <i>ACE</i>    | 106180      | AR          | Renal tubular dysgenesis                                                         | [1]       |
| <i>ACVR2B</i> | 602730      | Unknown     | Renal agenesis and renal hypoplasia in mice                                      | [2]       |
| <i>AGT</i>    | 106150      | AR          | Renal tubular dysgenesis                                                         | [1]       |
| <i>AGTR1</i>  | 106165      | AR          | Renal tubular dysgenesis                                                         | [1,3]     |
| <i>AGTR2</i>  | 300034      | AR          | UPJO                                                                             | [4]       |
| <i>BICC1</i>  | 614295      | AD          | Cystic renal dysplasia                                                           | [5]       |
| <i>BMP4</i>   | 112262      | AD          | Renal hypodysplasia                                                              | [6]       |
| <i>BMP7</i>   | 112267      | AD          | Renal dysplasia                                                                  | [7,8]     |
| <i>CDC5L</i>  | 602868      | AD          | Multicystic renal dysplasia                                                      | [8,9]     |
| <i>CHD1L</i>  | 613039      | AD          | Renal hypodysplasia, VUR, and UPJO                                               | [8,10]    |
| <i>DLX5</i>   | 600028      | AR          | Urethral malformation in mice                                                    | [11]      |
| <i>DLX6</i>   | 600030      | Unknown     | Urethral malformation in mice                                                    | [11]      |
| <i>DSTYK</i>  | 612666      | AD          | Renal hypodysplasia and UPJO                                                     | [12]      |
| <i>EMX2</i>   | 600035      | Unknown     | Urinary tract anomalies in mice compound heterozygous for Pax2 and Emx2          | [13]      |
| <i>EYA1</i>   | 601653      | AD          | Branchio-oto-renal syndrome, multicystic dysplastic kidney, and renal hypoplasia | [14,15]   |
| <i>FGF20</i>  | 605558      | AR          | Renal agenesis                                                                   | [16]      |
| <i>FOXC1</i>  | 601090      | AD          | Renal hypodysplasia                                                              | [17]      |
| <i>FRAS1</i>  | 607830      | AR          | Fraser syndrome                                                                  | [18,19]   |
| <i>FREM2</i>  | 608945      | AR          | Fraser syndrome                                                                  | [19,20]   |
| <i>GATA3</i>  | 131320      | AD          | Hypoparathyroidism, sensorineural deafness, and renal disease (HDR) syndrome     | [21]      |
| <i>GDF11</i>  | 603936      | Unknown     | Candidate gene                                                                   | [20]      |
| <i>GDNF</i>   | 600837      | AD          | Renal agenesis                                                                   | [22,23]   |
| <i>GFRA1</i>  | 601496      | AD          | Renal agenesis                                                                   | [23]      |
| <i>GREM1</i>  | 603054      | AR          | Renal agenesis                                                                   | [19]      |
| <i>HNF1B</i>  | 189907      | AD          | Renal hypodysplasia, MCDK, and renal cyst                                        | [24]      |
| <i>HOXC11</i> | 605559      | Unknown     | Renal agenesis and renal hypodysplasia in mice                                   | [25]      |
| <i>HOXA11</i> | 142958      | Unknown     | Renal agenesis and renal hypodysplasia in mice                                   | [25]      |
| <i>HOXD11</i> | 142986      | Unknown     | Renal agenesis and renal hypodysplasia in mice                                   | [25]      |
| <i>KAL1</i>   | 300836      | XLR         | Renal agenesis and Kallman syndrome                                              | [26]      |
| <i>MMP-1</i>  | 120353      | AR          | Obstructive uropathy                                                             | [27]      |
| <i>MMP-3</i>  | 185250      | Unknown     | Obstructive uropathy                                                             | [27]      |
| <i>MMP-8</i>  | 120355      | Unknown     | Obstructive uropathy                                                             | [27]      |
| <i>MUC1</i>   | 158340      | AD          | Medullary cystic kidney disease type 1                                           | [28]      |
| <i>NOTCH2</i> | 600275      | AD          | Alagille syndrome and Hajdu-Cheney syndrome with renal anomalies                 | [29,30]   |
| <i>PAX2</i>   | 167409      | AD          | Renal coloboma syndrome and renal hypodysplasia                                  | [31]      |
| <i>PKD1</i>   | 601313      | AD          | Autosomal dominant polycystic kidney disease                                     | [32]      |
| <i>PKD2</i>   | 173910      | AD          | Autosomal dominant polycystic kidney disease                                     | [32]      |

|                |        |         |                                                                      |         |
|----------------|--------|---------|----------------------------------------------------------------------|---------|
| <i>PKHD1</i>   | 606702 | AR      | Autosomal recessive polycystic kidney disease                        | [33]    |
| <i>REN</i>     | 179820 | AR      | Renal tubular dysgenesis                                             | [1]     |
| <i>RET</i>     | 164761 | AD      | Renal agenesis                                                       | [22]    |
| <i>ROBO2</i>   | 602431 | AD      | VUR                                                                  | [34,35] |
| <i>SALL1</i>   | 602218 | AD      | Renal hypodysplasia                                                  | [15]    |
| <i>SIX1</i>    | 601205 | AD      | Branchio-oto-renal syndrome                                          | [36]    |
| <i>SIX2</i>    | 604994 | AD      | Renal hypodysplasia                                                  | [6]     |
| <i>SIX4</i>    | 606342 | Unknown | Candidate gene                                                       | [20]    |
| <i>SIX5</i>    | 600963 | AD      | Branchio-oto-renal syndrome                                          | [37]    |
| <i>SLIT2</i>   | 603746 | AD      | Renal agenesis and MCDK                                              | [38]    |
| <i>SOX17</i>   | 610928 | AD      | VUR and UPJO                                                         | [39]    |
| <i>SPRY1</i>   | 602465 | Unknown | Candidate gene                                                       | [20]    |
| <i>TBX18</i>   | 604613 | AD      | Urinary tract anomalies                                              | [40]    |
| <i>TFAP2A</i>  | 107580 | AD      | Branchio-oto-renal syndrome                                          | [41]    |
| <i>TNXB</i>    | 600985 | AD      | VUR                                                                  | [42]    |
| <i>TRAP1</i>   | 606219 | AR      | VUR, renal agenesis, and VACTERL association                         | [43]    |
| <i>TSC2</i>    | 191092 | AD      | Cystic kidney disease in mice                                        | [44]    |
| <i>UMOD</i>    | 191845 | AD      | Medullary cystic kidney disease type 2 and hyperuricemic nephropathy | [45]    |
| <i>UPK3A</i>   | 611559 | AD      | Renal adysplasia                                                     | [46]    |
| <i>USF2</i>    | 600390 | AD      | Renal hypodysplasia                                                  | [47]    |
| <i>WNT4</i>    | 603490 | AD      | Renal hypodysplasia                                                  | [48]    |
| <i>WT1</i>     | 607102 | AD      | Diffuse mesangial sclerosis                                          | [49]    |
| <i>XPNPEP3</i> | 613553 | AR      | Renal cysts and dysplasia                                            | [50]    |

MIM, mendelian inheritance in man; AR, autosomal recessive; UPJO, ureteropelvic junction obstruction; AD, autosomal dominant; VUR, vesicoureteral reflux; MCDK, multicystic dysplastic kidney; XLR, X-linked recessive; VACTERL, vertebral defects, anal atresia, cardiac defects, trachea-esophageal fistula, renal anomalies, and limb abnormalities.

S. Table 2. Single nucleotide variant prioritization and filtering workflow.

| Step | Process                                                               | Variants (average) |
|------|-----------------------------------------------------------------------|--------------------|
| 1    | Joint call variants                                                   | 828,905            |
| 1-1  | Variants in coding region                                             | 18,398             |
| 1-2  | Not synonymous variants                                               | 12,078             |
| 1-3  | Rare variants (minor allele frequency < 1%) in 1000G, ExAC, and KRGDB | 3,698              |
| 2    | Sum of variants in each sample                                        | 5,285 (56.2)       |
| 2-1  | Variants in target 60 genes                                           | 620 (6.6)          |
| 2-2  | Qualified variants (Depth $\geq$ 5, VAF $>$ 0.3, GQ $\geq$ 20)        | 358 (3.8)          |
| 3    | Variant classification                                                |                    |
|      | Pathogenic                                                            | 6                  |
|      | Likely pathogenic                                                     | 2                  |
|      | Variants of uncertain significance                                    | 26                 |
|      | Benign                                                                | 324                |

1000G, 1000 Genomes Project; ExAC, Exome Aggregation Consortium; KRGDB, Korean Reference Genome Database; VAF, variant allele frequency; GQ, genotype quality.

S. Table 3. Variants of uncertain significance.

| Patient ID | Gene Transcript number      | Nucleotide | Amino acid   | Segregation | Frequency |         | MutationTaster | Renal phenotype                                       | Extra-renal phenotype                                                                            | Renal function   | Sanger sequencing |
|------------|-----------------------------|------------|--------------|-------------|-----------|---------|----------------|-------------------------------------------------------|--------------------------------------------------------------------------------------------------|------------------|-------------------|
|            |                             |            |              |             | KRGDB     | ExAC    |                |                                                       |                                                                                                  |                  |                   |
| 3          | <i>RET</i><br>NM_020975.6   | c.1921G>A  | p.Ala641Thr  | NA          | 0.0014    | 0.00004 | DC             | Bilateral RHD, horseshoe kidney, and left VUR         | Oligohydramnios                                                                                  | ESRD at 10.4 yr  | Yes               |
| 8          | <i>TNXB</i><br>NM_019105.8  | c.9749C>T  | p.Thr3250Met | NA          | 0         | 0.00006 | DC             | Left renal agenesis, right renal cysts, and right VUR | Testicular cystic mass and epididymal cysts                                                      | CKD              | No                |
| 8          | <i>ROBO2</i><br>NM_002942.5 | c.3553T>C  | p.Trp1185Arg | NA          | 0         | 0       | NA             | Left renal agenesis, right renal cysts, and right VUR | Testicular cystic mass and epididymal cysts                                                      | CKD              | No                |
| 13         | <i>TNXB</i><br>NM_019105.8  | c.2090T>C  | p.Leu697Pro  | NA          | 0.0018    | 0.00006 | DC             | Right MCDK and left VUR                               | Imperforate anus, duodenal obstruction due to annular pancreas, and choledochal cyst             | Normal at 9.8 yr | No                |
| 14         | <i>RET</i><br>NM_020975.6   | c.1618A>G  | p.Arg540Gly  | NA          | 0.0009    | 0.00004 | DC             | Bilateral RHD                                         | Epilepsy, attention deficit hyperactivity disorder, and post-transplant diabetes mellitus        | ESRD at 17.2 yr  | No                |
| 16         | <i>TNXB</i><br>NM_019105.8  | c.1364G>A  | p.Gly455Asp  | NA          | 0.0009    | 0.00001 | DC             | Bilateral RHD                                         | Birth asphyxia, nephrocalcinosis, hearing loss, periventricular leukomalacia, and cardiomyopathy | CKD              | No                |
| 17         | <i>RET</i><br>NM_020975.6   | c.874G>A   | p.Val292Met  | Mother      | 0.0018    | 0.0006  | DC             | Right RHD                                             | Hearing loss                                                                                     | CKD              | Yes               |

|    |                              |           |              |    |        |         |    |                                                |                                                                                                            |                 |     |
|----|------------------------------|-----------|--------------|----|--------|---------|----|------------------------------------------------|------------------------------------------------------------------------------------------------------------|-----------------|-----|
| 20 | <i>NOTCH2</i><br>NM_024408.4 | c.5684G>A | p.Arg1895His | NA | 0.0009 | 0.0001  | DC | Left renal agenesis                            | Micropenis                                                                                                 | CKD             | Yes |
| 22 | <i>ROBO2</i><br>NM_002942.5  | c.1435C>T | p.Arg479Trp  | NA | 0      | 0.00003 | DC | Left RHD, right renal cysts, and bilateral VUR | Oligohydramnios, post-transplant diabetes mellitus                                                         | ESRD at 6.6 yr  | No  |
| 28 | <i>TNXB</i><br>NM_019105.8   | c.2030A>G | p.Asp677Gly  | NA | 0.0045 | 0.0025  | DC | Bilateral RHD and bilateral VUR                | Preterm and oligohydroamnios                                                                               | CKD             | No  |
| 28 | <i>NOTCH2</i><br>NM_024408.4 | c.5557G>C | p.Asp1853His | NA | 0      | 0.00002 | DC | Bilateral RHD and bilateral VUR                | Preterm and oligohydroamnios                                                                               | CKD             | No  |
| 30 | <i>CHD1L</i><br>NM_004284.6  | c.1841G>A | p.Arg614Gln  | NA | 0.0077 | 0.0001  | DC | Bilateral RHD and renal cysts                  | Atrial septal defect, short stature, hearing loss, and hypothyroidism                                      | ESRD at 2.9 yr  | No  |
| 31 | <i>CHD1L</i><br>NM_004284.6  | c.2345T>C | p.Leu782Ser  | NA | 0.0036 | 0.00005 | DC | Right renal agenesis and left hydronephrosis   | Developmental delay, retroperitoneal pseudocyst, and hearing loss                                          | CKD             | No  |
| 41 | <i>HNF1B</i><br>NM_000458.4  | c.439C>G  | p.Gln147Glu  | NA | 0      | 0       | DC | Bilateral RHD and renal cysts                  | Patent ductus arteriosus, ureter stone, pancreas hypoplasia, common bile-duct dilatation, and hepatic cyst | CKD             | Yes |
| 55 | <i>ROBO2</i><br>NM_002942.5  | c.3585G>T | p.Gln1195His | NA | 0      | 0.00001 | NA | Bilateral VUR                                  | No                                                                                                         | CKD             | Yes |
| 58 | <i>SLIT2</i><br>NM_004787.4  | c.674G>A  | p.Arg225His  | NA | 0.0005 | 0.0001  | DC | Right MCDK and bilateral VUR                   | Parietal lobe epilepsy, multiple neuropathic pain, hypomagnesemia, and hyperuricemia                       | ESRD at 21.1 yr | No  |

|    |                              |                        |                            |    |                  |                    |          |                                    |                                             |                 |     |
|----|------------------------------|------------------------|----------------------------|----|------------------|--------------------|----------|------------------------------------|---------------------------------------------|-----------------|-----|
| 63 | <i>HNF1B</i><br>NM_000458.4  | c.313G>A               | p.Glu105Lys                | NA | 0.0014           | 0.0001             | DC       | Bilateral RHD and left VUR         | No                                          | ESRD at 20.1 yr | Yes |
| 66 | <i>SLIT2</i><br>NM_004787.4  | c.1046C>T              | p.Ser349Phe                | NA | 0.0005           | 0                  | DC       | Bilateral VUR                      | No                                          | CKD             | No  |
| 73 | <i>SIX2</i><br>NM_016932.5   | c.707C>T               | p.Pro236Leu                | NA | 0.0005           | 0.0002             | DC       | Bilateral RHD and bilateral VUR    | Post-transplant diabetes mellitus           | ESRD at 13.6 yr | No  |
| 73 | <i>SLIT2</i><br>NM_004787.4  | c.4488G>T              | p.Arg1496Ser               | NA | 0.0014           | 0.00002            | DC       | Bilateral RHD and bilateral VUR    | Post-transplant diabetes mellitus           | ESRD at 13.6 yr | No  |
| 76 | <i>TNXB</i><br>NM_019105.8   | c.2030A>G              | p.Asp677Gly                | NA | 0.0045           | 0.0025             | DC       | Right RHD and bilateral VUR        | No                                          | CKD             | No  |
| 76 | <i>NOTCH2</i><br>NM_024408.4 | c.5557G>C              | p.Asp1853His               | NA | 0                | 0.0002             | DC       | Right RHD and bilateral VUR        | No                                          | CKD             | No  |
| 79 | <i>DSTYK</i><br>NM_015375.3  | c.1718T>C              | p.Ile573Thr                | NA | 0                | 0                  | DC       | Bilateral VUR                      | Complex febrile seizure and inguinal hernia | CKD             | No  |
| 81 | <i>ACE</i><br>NM_000789.4    | c.2186G>A<br>c.2803C>T | p.Arg729Gln<br>p.Pro935Ser | NA | 0.0009<br>0.0005 | 0.00003<br>0.00002 | DC<br>DC | Bilateral VUR                      | No                                          | ESRD at 15.5 yr | Yes |
| 86 | <i>CHD1L</i><br>NM_004284.6  | c.968A>T               | p.Asp323Val                | NA | 0.0027           | 0.0001             | DC       | Right renal agenesis and left UVJO | Hematometra with upper vaginal obstruction  | CKD             | No  |

KRGDB, Korean Reference Genome Database; ExAC, Exome Aggregation Consortium; NA, not available; DC, disease causing; RHD, renal hypodysplasia; ESRD, end stage renal disease; CKD, chronic kidney disease; MCDK, multicystic dysplastic kidney; VUR, vesicoureteral reflux; UVJO, ureterovesical junction obstruction.

S. Table 4. Clinical presentation of study participants.

| Patient ID | Sex | Age at enrollment (yr) | Right kidney   | Left kidney          | Extra-renal phenotype | Renal outcome          | Parental sampling |
|------------|-----|------------------------|----------------|----------------------|-----------------------|------------------------|-------------------|
| 1          | F   | 21.1                   | Renal agenesis | Renal cortical cysts | No                    | ESRD at 20.8 yr        | Father and mother |
| 2          | M   | 18.5                   | RHD            | RHD                  | No                    | CKD stage 3 at 21.0 yr | ND                |
| 3          | M   | 20.6                   | RHD            | RHD and VUR          | Oligohydroamnios      | ESRD at 10.4 yr        | NA                |

|    |   |      |                              |                              |                                                                                                                                           |                        |                   |
|----|---|------|------------------------------|------------------------------|-------------------------------------------------------------------------------------------------------------------------------------------|------------------------|-------------------|
| 4  | M | 21.8 | RHD                          | RHD                          | Preterm, oligohydramnios, developmental delay, microcephaly, spastic quadriplegia, inguinal hernia, and post-transplant diabetes mellitus | ESRD at 6.8 yr         | ND                |
| 5  | F | 19.4 | RHD and UPJO                 | RHD and UPJO                 | No                                                                                                                                        | ESRD at 18.7 yr        | ND                |
| 6  | F | 19.3 | No                           | Renal agenesis               | No                                                                                                                                        | Normal at 21.7 yr      | ND                |
| 7  | M | 18.4 | RHD                          | RHD                          | Morning glory discs, dilated cardiomyopathy, and hypothyroidism                                                                           | ESRD at 10.4 yr        | NA                |
| 8  | M | 17.0 | Renal cortical cysts and VUR | Renal agenesis               | Testicular cystic mass and epididymal cysts                                                                                               | CKD stage 3 at 19.5 yr | NA                |
| 9  | M | 17.0 | RHD                          | RHD and renal cortical cysts | No                                                                                                                                        | ESRD at 16.9 yr        | ND                |
| 10 | M | 17.3 | No                           | RHD and VUR                  | Thyroid colloid cysts                                                                                                                     | CKD stage 2 at 20.1 yr | ND                |
| 11 | M | 20.0 | RHD and renal cortical cysts | RHD and renal cortical cysts | Oligohydramnios                                                                                                                           | ESRD at 16.9 yr        | ND                |
| 12 | M | 15.3 | RHD                          | RHD                          | No                                                                                                                                        | CKD stage 3 at 18.0 yr | ND                |
| 13 | M | 8.5  | MCDK                         | VUR                          | Imperforate anus, duodenal obstruction due to annular pancreas, and choledochal cyst                                                      | Normal at 9.8 yr       | NA                |
| 14 | M | 19.1 | RHD                          | RHD                          | Epilepsy, attention deficit hyperactivity disorder, and post-transplant diabetes mellitus                                                 | ESRD at 17.2 yr        | NA                |
| 15 | F | 14.5 | RHD                          | RHD                          | Pre-auricular pit and hearing loss                                                                                                        | ESRD at 5.4 yr         | ND                |
| 16 | M | 16.3 | RHD                          | RHD                          | Birth asphyxia, nephrocalcinosis, hearing loss, periventricular leukomalacia, and cardiomyopathy                                          | CKD stage 5 at 17.3 yr | NA                |
| 17 | F | 17.6 | RHD                          | No                           | Hearing loss                                                                                                                              | CKD stage 2 at 19.8 yr | Father and mother |
| 18 | M | 0.8  | RHD and VUR                  | RHD                          | Oligohydramnios                                                                                                                           | CKD stage 3 at 3.5 yr  | NA                |
| 19 | M | 20.1 | RHD                          | RHD                          | No                                                                                                                                        | CKD stage 3 at 22.8 yr | NA                |
| 20 | M | 16.0 | No                           | Renal agenesis               | Micropenis                                                                                                                                | CKD stage 5 at 16.0 yr | NA                |
| 21 | M | 9.5  | RHD                          | RHD                          | No                                                                                                                                        | CKD stage 2 at 12.3 yr | NA                |

|    |   |      |                              |                                      |                                                                                                                                          |                        |                   |
|----|---|------|------------------------------|--------------------------------------|------------------------------------------------------------------------------------------------------------------------------------------|------------------------|-------------------|
| 22 | M | 8.3  | Renal cortical cysts and VUR | RHD and VUR                          | Oligohydramnios, post-transplant diabetes mellitus                                                                                       | ESRD at 6.6 yr         | NA                |
| 23 | M | 9.1  | RHD                          | RHD                                  | Preterm, oligohydramnios, and atrial septal defect                                                                                       | ESRD at 6.0 yr         | NA                |
| 24 | M | 7.8  | Renal agenesis               | Duplicated ureter and hydronephrosis | Preterm, oligohydramnios, tetralogy of Fallot, imperforate anus, anorectal malformation, patent urachus, strabismus, and inguinal hernia | CKD stage 2 at 10.2 yr | NA                |
| 25 | F | 13.7 | RHD and renal cortical cysts | RHD and renal cortical cysts         | Preterm and oligohydroamnios                                                                                                             | ESRD at 7.4 yr         | NA                |
| 26 | M | 6.1  | RHD                          | RHD                                  | Preterm and oligohydroamnios                                                                                                             | CKD stage 3 at 8.9 yr  | NA                |
| 28 | M | 5.9  | RHD and VUR                  | RHD and VUR                          | Preterm and oligohydroamnios                                                                                                             | CKD stage 3 at 8.7 yr  | NA                |
| 29 | M | 5.3  | RHD and renal cortical cysts | RHD and renal cortical cysts         | Preterm, oligohydroamnios, inguinal hernia, and developmental delay                                                                      | ESRD at 1 mo           | Father and mother |
| 30 | F | 4.8  | RHD and renal cortical cysts | RHD and renal cortical cysts         | Atrial septal defect, short stature, hearing loss, and hypothyroidism                                                                    | ESRD at 2.9 yr         | NA                |
| 31 | M | 5.5  | Renal agenesis               | Hydronephrosis                       | Developmental delay, retroperitoneal pseudocyst, and hearing loss                                                                        | CKD stage 3 at 8.3 yr  | NA                |
| 32 | M | 8.3  | RHD and VUR                  | VUR                                  | No                                                                                                                                       | CKD stage 2 at 11.2 yr | ND                |
| 33 | M | 15.9 | RHD                          | Renal agenesis and VUR               | No                                                                                                                                       | CKD stage 5 at 18.7 yr | ND                |
| 34 | M | 12.2 | RHD and renal cortical cysts | RHD and renal cortical cysts         | Preterm, imperforate anus, hypospadias, and choledocal cyst                                                                              | CKD 3 at 13.6 yr       | ND                |
| 35 | M | 10.9 | RHD                          | RHD                                  | Preterm, oligohydroamnios, branchial cleft cyst, lymphoma, developmental delay, autism, and inguinal hernia                              | ESRD at 12.1 yr        | NA                |
| 36 | M | 4.6  | RHD and renal cortical cysts | RHD and renal cortical cysts         | Oligohydramnios, hereditary multiple exostoses and congenital ptosis                                                                     | CKD stage 3 at 7.5 yr  | ND                |
| 37 | M | 12.8 | RHD and renal cortical cysts | RHD and renal cortical cysts         | Preterm, oligohydroamnios, attention deficit hyperactivity disorder                                                                      | ESRD at 12.2 yr        | ND                |
| 38 | M | 13.8 | RHD and renal cortical cysts | RHD, renal cortical cysts, and VUR   | Preterm, mental retardation, attention deficit hyperactivity disorder, hearing loss, and intermittent exotropia                          | CKD stage 3 at 16.6 yr | ND                |
| 39 | F | 22.1 | RHD and renal cortical cysts | RHD and renal cortical cysts         | No                                                                                                                                       | ESRD at 13.4 yr        | ND                |

|    |   |      |                              |                              |                                                                                                            |                        |    |
|----|---|------|------------------------------|------------------------------|------------------------------------------------------------------------------------------------------------|------------------------|----|
| 40 | M | 11.2 | RHD and renal cortical cysts | RHD and renal cortical cysts | Nail dysplasia                                                                                             | ESRD at 5.2 yr         | ND |
| 41 | M | 18.1 | RHD and renal cortical cysts | RHD and renal cortical cysts | Patent ductus arteriosus, ureter stone, pancreas hypoplasia, common bile-duct dilatation, and hepatic cyst | CKD stage 5 at 20.3 yr | NA |
| 42 | M | 9.8  | RHD and renal cortical cysts | RHD and renal cortical cysts | Preterm, jeunal atresia, cerebral palsy (periventricular leukomalacia)                                     | CKD stage 3 at 12.8 yr | ND |
| 43 | M | 15.4 | RHD and renal cortical cysts | RHD and renal cortical cysts | Hyperuricemia                                                                                              | CKD stage 3 at 15.8 yr | ND |
| 44 | M | 24.5 | RHD                          | Renal cortical cysts         | Hyperuricemia                                                                                              | CKD stage 2 at 27 yr   | ND |
| 45 | F | 10.2 | RHD and renal cortical cysts | RHD and renal cortical cysts | Preterm, oligohydramnios, hypothyroidism and Fanconi syndrome                                              | CKD stage 5 at 13.2 yr | ND |
| 46 | M | 23.2 | RHD and renal cortical cysts | RHD                          | Thrombocytopenia                                                                                           | ESRD at 18.5 yr        | ND |
| 48 | F | 28.0 | RHD                          | RHD                          | Hypothyroidism                                                                                             | ESRD at 27.9 yr        | ND |
| 49 | M | 1.6  | VUR                          | RHD and VUR                  | Preterm and hypospadias                                                                                    | Normal at 4.4 yr       | ND |
| 50 | M | 26.1 | Mid-ureteral obstruction     | MCDK                         | Post-transplant diabetes mellitus                                                                          | ESRD at 17.6 yr        | ND |
| 51 | M | 11.9 | No                           | MCDK and ureterocele         | Preterm, atrial septal defect, bilateral undescended testis, and omphalocele                               | Normal at 11.9 yr      | ND |
| 52 | F | 12.2 | RHD and renal cortical cysts | MCDK                         | Preterm and oligohydroamnios,                                                                              | ESRD at 11 mo          | ND |
| 53 | M | 21.3 | RHD                          | RHD and VUR                  | No                                                                                                         | ESRD at 7.2 yr         | ND |
| 54 | M | 20.0 | VUR                          | VUR                          | No                                                                                                         | ESRD at 20.0 yr        | ND |
| 55 | M | 19.9 | VUR                          | VUR                          | No                                                                                                         | CKD stage 3 at 22.4 yr | NA |
| 56 | M | 18.2 | VUR                          | VUR                          | Intermittent exotropia                                                                                     | CKD stage 3 at 21.1 yr | ND |
| 57 | M | 17.6 | VUR                          | VUR                          | No                                                                                                         | ESRD at 16.7 yr        | ND |
| 58 | M | 22.8 | MCDK and VUR                 | VUR                          | Parietal lobe epilepsy, multiple neuropathic pain, hypomagnesemia, and hyperuricemia                       | ESRD at 21.1 yr        | NA |



|    |   |      |             |             |                                                                        |         |                        |    |
|----|---|------|-------------|-------------|------------------------------------------------------------------------|---------|------------------------|----|
| 59 | M | 16.8 | VUR         | VUR         |                                                                        | No      | CKD stage 5 at 19.8 yr | ND |
| 60 | M | 17.3 | RHD and VUR | RHD and VUR |                                                                        | No      | ESRD at 17.0 yr        | ND |
| 61 | M | 19.3 | VUR         | VUR         | Optic disc coloboma and strabismus                                     |         | CKD stage 5 at 22.4 yr | ND |
| 62 | M | 22.3 | VUR         | VUR         |                                                                        | No      | CKD stage 3 at 23.6 yr | ND |
| 63 | M | 23.2 | RHD         | RHD and VUR |                                                                        | No      | ESRD at 20.1 yr        | NA |
| 64 | M | 14.2 | VUR         | RHD and VUR |                                                                        | No      | ESRD at 5.6 yr         | ND |
| 65 | M | 25.2 | VUR         | VUR         |                                                                        | No      | ESRD at 16.9 yr        | ND |
| 66 | M | 18.9 | VUR         | VUR         |                                                                        | No      | CKD stage 3 at 21.3 yr | NA |
| 67 | M | 12.0 | RHD and VUR | VUR         | Atrial septal defect and epiblepharon                                  |         | CKD stage 4 at 14.9 yr | ND |
| 68 | M | 12.1 | RHD and VUR | RHD and VUR | Oligohydraminos                                                        |         | ESRD at 8.9 yr         | ND |
| 69 | M | 21.6 | RHD         | RHD         |                                                                        | No      | ESRD at 20.0 yr        | ND |
| 70 | M | 21.2 | RHD and VUR | VUR         | Intellectual and developmental delay, nocturnal enuresis, and insomnia |         | CKD stage 4 at 21.2 yr | ND |
| 71 | M | 9.0  | VUR         | VUR         |                                                                        | Preterm | CKD stage 2 at 11.8 yr | ND |
| 72 | F | 22.9 | VUR         | VUR         | bilateral superior vena cava                                           |         | ESRD at 21.6 yr        | ND |
| 73 | M | 12.9 | RHD and VUR | RHD and VUR | Post-transplant diabetes mellitus                                      |         | ESRD at 13.6 yr        | NA |
| 74 | M | 8.6  | RHD         | VUR         | Preterm, umbilical hernia, inguinal hernia, and cryptorchidism         |         | CKD stage 2 at 10.6 yr | ND |
| 75 | M | 7.9  | VUR         | VUR         |                                                                        | Preterm | CKD stage 4 at 10.8 yr | ND |
| 76 | M | 19.7 | RHD and VUR | VUR         |                                                                        | No      | CKD stage 2 at 19.7 yr | NA |

|    |   |      |                                    |                                    |                                                                                                                                         |                   |                        |                   |
|----|---|------|------------------------------------|------------------------------------|-----------------------------------------------------------------------------------------------------------------------------------------|-------------------|------------------------|-------------------|
| 77 | M | 11.9 | RHD                                | RHD and VUR                        |                                                                                                                                         | No                | CKD stage 4 at 11.9 yr | ND                |
| 78 | M | 4.9  | RHD and VUR                        | VUR                                |                                                                                                                                         | No                | ESRD at 4 mo           | ND                |
| 79 | M | 15.5 | VUR                                | VUR                                | Complex febrile seizure and inguinal hernia                                                                                             |                   | CKD stage 5 at 18.2 yr | NA                |
| 80 | M | 9.3  | RHD, renal cortical cysts, and VUR | RHD, renal cortical cysts, and VUR | Oligohydramnios, developmental delay and sensory neural hearing loss                                                                    |                   | ESRD at 2 mo           | ND                |
| 81 | M | 15.8 | VUR                                | VUR                                |                                                                                                                                         | No                | ESRD at 15.5 yr        | NA                |
| 82 | M | 15.5 | RHD and renal cortical cysts       | RHD and renal cortical cysts       |                                                                                                                                         | Diabetes mellitus | Normal at 18.1 yr      | ND                |
| 83 | M | 16.9 | PUV                                | PUV                                |                                                                                                                                         | Hearing loss      | CKD stage 3 at 19.8 yr | ND                |
| 84 | M | 5.3  | PUV and RHD                        | PUV and RHD                        | Preterm and oligohydroamnios                                                                                                            |                   | CKD stage 4 at 8.2 yr  | ND                |
| 85 | M | 4.3  | PUV and RHD                        | PUV and RHD                        | Preterm, oligohydroamnios, hypothyroidism, inguinal hernia, hypertrophic cardiomyopathy, auricular benign cyst, and developmental delay |                   | ESRD at 5 mo           | ND                |
| 86 | F | 20.6 | Renal agenesis                     | UVJO                               | Hematometra with upper vaginal obstruction                                                                                              |                   | CKD stage 2 at 23.6 yr | NA                |
| 87 | M | 13.8 | UPJO                               | UPJO                               |                                                                                                                                         | No                | ESRD at 13.4 yr        | ND                |
| 88 | F | 3.1  | VUR                                | Renal agenesis                     |                                                                                                                                         | No                | CKD stage 2 at 5.8 yr  | ND                |
| 89 | M | 14.7 | Hydronephrosis                     | MCDK                               |                                                                                                                                         | No                | CKD stage 2 at 5.1 yr  | ND                |
| 90 | F | 14.4 | UPJO                               | MCDK                               | Partial bicornuate uterus or partial septated uterus                                                                                    |                   | CKD stage 2 at 15.4 yr | ND                |
| 91 | F | 10.7 | MCDK                               | Hydronephrosis                     | Preterm, oligohydroamnios, imperforated anus, vaginal anomaly, and ambiguous genitalia                                                  |                   | CKD stage 2 at 13.1 yr | ND                |
| 92 | M | 10.4 | RHD and renal cortical cysts       | MCDK                               | Oligohydramnios, choledochal cyst, and hypomagnesemia                                                                                   |                   | CKD stage 2 at 13.0 yr | Father and mother |
| 93 | M | 3.5  | Renal cortical cysts               | MCDK                               | Preterm and portal vein thrombosis                                                                                                      |                   | Normal at 3.5 yr       | ND                |

|    |   |      |                              |                              |                                                                                                                                                             |                        |                   |
|----|---|------|------------------------------|------------------------------|-------------------------------------------------------------------------------------------------------------------------------------------------------------|------------------------|-------------------|
| 94 | M | 15.6 | RHD and renal cortical cysts | RHD and renal cortical cysts | Developmental delay, Atrial septal defect, cleft palate, cerebral palsy, congenital patellar dislocation, congenital blepharoptosis, and skeletal dysplasia | CKD sate 2 at 18.1 yr  | ND                |
| 95 | M | 14.5 | RHD and renal cortical cysts | RHD and renal cortical cysts | Optic disc anomaly, hemolytic anemia, and attention deficit hyperactivity disorder                                                                          | ESRD at 3.2 yr         | Father and mother |
| 96 | M | 10.9 | VUR and ureterocele          | RHD                          | No                                                                                                                                                          | CKD stage 3 at 13.9 yr | ND                |

Yr, years; F, female; M, male; ESRD, end stage renal disease; RHD, renal hypodysplasia; CKD, chronic kidney disease; ND, not done; NA, not available; VUR, vesicoureteral reflux; UPJO, ureteropelvic junction obstruction; MCDK, multicystic dysplastic kidney; mo, months; UVJO, ureterovesical junction obstruction; PUV, posterior urethral valve.

## References

1. Gribouval, O.; Moriniere, V.; Pawtowski, A.; Arrondel, C.; Sallinen, S.L.; Saloranta, C.; Clericuzio, C.; Viot, G.; Tantau, J.; Blesson, S., et al. Spectrum of mutations in the renin-angiotensin system genes in autosomal recessive renal tubular dysgenesis. *Human mutation* **2012**, *33*, 316-326, doi:10.1002/humu.21661.
2. Oh, S.P.; Li, E. The signaling pathway mediated by the type IIB activin receptor controls axial patterning and lateral asymmetry in the mouse. *Genes Dev* **1997**, *11*, 1812-1826, doi:10.1101/gad.11.14.1812.
3. Weber, S.; Landwehr, C.; Renkert, M.; Hoischen, A.; Wuhl, E.; Denecke, J.; Radlwimmer, B.; Haffner, D.; Schaefer, F.; Weber, R.G. Mapping candidate regions and genes for congenital anomalies of the kidneys and urinary tract (CAKUT) by array-based comparative genomic hybridization. *Nephrology, dialysis, transplantation: Official publication of the European Dialysis and Transplant Association - European Renal Association* **2011**, *26*, 136-143, doi:10.1093/ndt/gfq400.
4. Nishimura, H.; Yerkes, E.; Hohenfellner, K.; Miyazaki, Y.; Ma, J.; Hunley, T.E.; Yoshida, H.; Ichiki, T.; Threadgill, D.; Phillips, J.A., 3rd, et al. Role of the angiotensin type 2 receptor gene in congenital anomalies of the kidney and urinary tract, CAKUT, of mice and men. *Molecular cell* **1999**, *3*, 1-10.
5. Kraus, M.R.; Clauin, S.; Pfister, Y.; Di Maio, M.; Ulinski, T.; Constam, D.; Bellanne-Chantelot, C.; Grapin-Botton, A. Two mutations in human BICC1 resulting in Wnt pathway hyperactivity associated with cystic renal dysplasia. *Human mutation* **2012**, *33*, 86-90, doi:10.1002/humu.21610.
6. Weber, S.; Taylor, J.C.; Winyard, P.; Baker, K.F.; Sullivan-Brown, J.; Schild, R.; Knuppel, T.; Zurowska, A.M.; Caldas-Alfonso, A.; Litwin, M., et al. SIX2 and BMP4 mutations associate with anomalous kidney development. *Journal of the American Society of Nephrology: JASN* **2008**, *19*, 891-903, doi:10.1681/ASN.2006111282.
7. Dudley, A.T.; Lyons, K.M.; Robertson, E.J. A requirement for bone morphogenetic protein-7 during development of the mammalian kidney and eye. *Genes Dev* **1995**, *9*, 2795-2807.
8. Hwang, D.Y.; Dworschak, G.C.; Kohl, S.; Saisawat, P.; Vivante, A.; Hilger, A.C.; Reutter, H.M.; Soliman, N.A.; Bogdanovic, R.; Kehinde, E.O., et al. Mutations in 12 known dominant disease-causing genes clarify many congenital anomalies of the kidney and urinary tract. *Kidney international* **2014**, *85*, 1429-1433, doi:10.1038/ki.2013.508.
9. Groenen, P.M.; Vanderlinden, G.; Devriendt, K.; Fryns, J.P.; Van de Ven, W.J. Rearrangement of the human CDC5L gene by a t(6;19)(p21;q13.1) in a patient with multicystic renal dysplasia. *Genomics* **1998**, *49*, 218-229, doi:10.1006/geno.1998.5254.
10. Brockschmidt, A.; Chung, B.; Weber, S.; Fischer, D.C.; Kolatsi-Joannou, M.; Christ, L.; Heimbach, A.; Shtiza, D.; Klaus, G.; Simonetti, G.D., et al. CHD1L: A new candidate gene for congenital anomalies of the kidneys and urinary tract (CAKUT). *Nephrology, dialysis, transplantation: Official publication of the European Dialysis and Transplant Association - European Renal Association* **2012**, *27*, 2355-2364, doi:10.1093/ndt/gfr649.
11. Suzuki, K.; Haraguchi, R.; Ogata, T.; Barbieri, O.; Alegria, O.; Vieux-Rochas, M.; Nakagata, N.; Ito, M.; Mills, A.A.; Kurita, T., et al. Abnormal urethra formation in mouse models of split-hand/split-foot malformation type 1 and type 4. *European journal of human genetics: EJHG* **2008**, *16*, 36-44, doi:10.1038/sj.ejhg.5201925.
12. Sanna-Cherchi, S.; Sampogna, R.V.; Papeta, N.; Burgess, K.E.; Nees, S.N.; Perry, B.J.; Choi, M.; Bodria, M.; Liu, Y.; Weng, P.L., et al. Mutations in DSTYK and dominant urinary tract malformations. *The New England journal of medicine* **2013**, *369*, 621-629, doi:10.1056/NEJMoa1214479.
13. Boualia, S.K.; Gaitan, Y.; Murawski, I.; Nadon, R.; Gupta, I.R.; Bouchard, M. Vesicoureteral reflux and other urinary tract malformations in mice compound heterozygous for Pax2 and Emx2. *PLoS ONE* **2011**, *6*, e21529, doi:10.1371/journal.pone.0021529.
14. Orten, D.J.; Fischer, S.M.; Sorensen, J.L.; Radhakrishna, U.; Cremers, C.W.; Marres, H.A.; Van Camp, G.; Welch, K.O.; Smith, R.J.; Kimberling, W.J. Branchio-oto-renal syndrome (BOR): Novel mutations in the EYA1 gene, and a review of the mutational genetics of BOR. *Human mutation* **2008**, *29*, 537-544, doi:10.1002/humu.20691.
15. Weber, S.; Moriniere, V.; Knuppel, T.; Charbit, M.; Dusek, J.; Ghiggeri, G.M.; Jankauskiene, A.; Mir, S.; Montini, G.; Peco-Antic, A., et al. Prevalence of mutations in renal developmental genes in children with renal hypodysplasia: Results of the ESCAPE study. *Journal of the American Society of Nephrology: JASN* **2006**, *17*, 2864-2870, doi:10.1681/ASN.2006030277.

16. Barak, H.; Huh, S.H.; Chen, S.; Jeanpierre, C.; Martinovic, J.; Parisot, M.; Bole-Feysot, C.; Nitschke, P.; Salomon, R.; Antignac, C., et al. FGF9 and FGF20 maintain the stemness of nephron progenitors in mice and man. *Dev Cell* **2012**, *22*, 1191-1207, doi:10.1016/j.devcel.2012.04.018.
17. Nakano, T.; Niimura, F.; Hohenfellner, K.; Miyakita, E.; Ichikawa, I. Screening for mutations in BMP4 and FOXC1 genes in congenital anomalies of the kidney and urinary tract in humans. *The Tokai journal of experimental and clinical medicine* **2003**, *28*, 121-126.
18. van Haelst, M.M.; Maiburg, M.; Baujat, G.; Jadeja, S.; Monti, E.; Bland, E.; Pearce, K.; Fraser Syndrome Collaboration, G.; Hennekam, R.C.; Scambler, P.J. Molecular study of 33 families with Fraser syndrome new data and mutation review. *American journal of medical genetics. Part A* **2008**, *146A*, 2252-2257, doi:10.1002/ajmg.a.32440.
19. Kohl, S.; Hwang, D.Y.; Dworschak, G.C.; Hilger, A.C.; Saisawat, P.; Vivante, A.; Stajic, N.; Bogdanovic, R.; Reutter, H.M.; Kehinde, E.O., et al. Mild recessive mutations in six Fraser syndrome-related genes cause isolated congenital anomalies of the kidney and urinary tract. *Journal of the American Society of Nephrology: JASN* **2014**, *25*, 1917-1922, doi:10.1681/ASN.2013101103.
20. Saisawat, P.; Tasic, V.; Vega-Warner, V.; Kehinde, E.O.; Gunther, B.; Airik, R.; Innis, J.W.; Hoskins, B.E.; Hoefele, J.; Otto, E.A., et al. Identification of two novel CAKUT-causing genes by massively parallel exon resequencing of candidate genes in patients with unilateral renal agenesis. *Kidney international* **2012**, *81*, 196-200, doi:10.1038/ki.2011.315.
21. Ali, A.; Christie, P.T.; Grigorieva, I.V.; Harding, B.; Van Esch, H.; Ahmed, S.F.; Bitner-Glindzicz, M.; Blind, E.; Bloch, C.; Christin, P., et al. Functional characterization of GATA3 mutations causing the hypoparathyroidism-deafness-renal (HDR) dysplasia syndrome: Insight into mechanisms of DNA binding by the GATA3 transcription factor. *Human molecular genetics* **2007**, *16*, 265-275, doi:10.1093/hmg/ddl454.
22. Skinner, M.A.; Safford, S.D.; Reeves, J.G.; Jackson, M.E.; Freemerman, A.J. Renal aplasia in humans is associated with RET mutations. *American journal of human genetics* **2008**, *82*, 344-351, doi:10.1016/j.ajhg.2007.10.008.
23. Chatterjee, R.; Ramos, E.; Hoffman, M.; VanWinkle, J.; Martin, D.R.; Davis, T.K.; Hoshi, M.; Hmiel, S.P.; Beck, A.; Hruska, K., et al. Traditional and targeted exome sequencing reveals common, rare and novel functional deleterious variants in RET-signaling complex in a cohort of living US patients with urinary tract malformations. *Human genetics* **2012**, *131*, 1725-1738, doi:10.1007/s00439-012-1181-3.
24. Clissold, R.L.; Hamilton, A.J.; Hattersley, A.T.; Ellard, S.; Bingham, C. HNF1B-associated renal and extra-renal disease-an expanding clinical spectrum. *Nat Rev Nephrol* **2015**, *11*, 102-112, doi:10.1038/nrneph.2014.232.
25. Wellik, D.M.; Hawkes, P.J.; Capecchi, M.R. Hox11 paralogous genes are essential for metanephric kidney induction. *Genes Dev* **2002**, *16*, 1423-1432, doi:10.1101/gad.993302.
26. Albuissou, J.; Pecheux, C.; Carel, J.C.; Lacombe, D.; Leheup, B.; Lapuzina, P.; Bouchard, P.; Legius, E.; Matthijs, G.; Wasniewska, M., et al. Kallmann syndrome: 14 novel mutations in KAL1 and FGFR1 (KAL2). *Human mutation* **2005**, *25*, 98-99, doi:10.1002/humu.9298.
27. Djuric, T.; Zivkovic, M.; Milosevic, B.; Andjolevski, M.; Cvetkovic, M.; Kostic, M.; Stankovic, A. MMP-1 and -3 haplotype is associated with congenital anomalies of the kidney and urinary tract. *Pediatric nephrology* **2014**, *29*, 879-884, doi:10.1007/s00467-013-2699-x.
28. Kirby, A.; Gnirke, A.; Jaffe, D.B.; Baresova, V.; Pochet, N.; Blumenstiel, B.; Ye, C.; Aird, D.; Stevens, C.; Robinson, J.T., et al. Mutations causing medullary cystic kidney disease type 1 lie in a large VNTR in MUC1 missed by massively parallel sequencing. *Nature genetics* **2013**, *45*, 299-303, doi:10.1038/ng.2543.
29. Kamath, B.M.; Bauer, R.C.; Loomes, K.M.; Chao, G.; Gerfen, J.; Hutchinson, A.; Hardikar, W.; Hirschfield, G.; Jara, P.; Krantz, I.D., et al. NOTCH2 mutations in Alagille syndrome. *Journal of medical genetics* **2012**, *49*, 138-144, doi:10.1136/jmedgenet-2011-100544.
30. Narumi, Y.; Min, B.J.; Shimizu, K.; Kazukawa, I.; Sameshima, K.; Nakamura, K.; Kosho, T.; Rhee, Y.; Chung, Y.S.; Kim, O.H., et al. Clinical consequences in truncating mutations in exon 34 of NOTCH2: Report of six patients with Hajdu-Cheney syndrome and a patient with serpentine fibula polycystic kidney syndrome. *American journal of medical genetics. Part A* **2013**, *161A*, 518-526, doi:10.1002/ajmg.a.35772.
31. Bower, M.; Salomon, R.; Allanson, J.; Antignac, C.; Benedicenti, F.; Benetti, E.; Binenbaum, G.; Jensen, U.B.; Cochat, P.; DeCramer, S., et al. Update of PAX2 mutations in renal coloboma syndrome and establishment of a locus-specific database. *Human mutation* **2012**, *33*, 457-466, doi:10.1002/humu.22020.
32. Rossetti, S.; Consugar, M.B.; Chapman, A.B.; Torres, V.E.; Guay-Woodford, L.M.; Grantham, J.J.; Bennett, W.M.; Meyers, C.M.; Walker, D.L.; Bae, K., et al. Comprehensive molecular diagnostics in autosomal

- dominant polycystic kidney disease. *Journal of the American Society of Nephrology: JASN* **2007**, *18*, 2143-2160, doi:10.1681/ASN.2006121387.
33. Ward, C.J.; Hogan, M.C.; Rossetti, S.; Walker, D.; Sneddon, T.; Wang, X.; Kubly, V.; Cunningham, J.M.; Bacallao, R.; Ishibashi, M., et al. The gene mutated in autosomal recessive polycystic kidney disease encodes a large, receptor-like protein. *Nature genetics* **2002**, *30*, 259-269, doi:10.1038/ng833.
  34. Bertoli-Avella, A.M.; Conte, M.L.; Punzo, F.; de Graaf, B.M.; Lama, G.; La Manna, A.; Polito, C.; Grassia, C.; Nobili, B.; Rambaldi, P.F., et al. ROBO2 gene variants are associated with familial vesicoureteral reflux. *Journal of the American Society of Nephrology: JASN* **2008**, *19*, 825-831, doi:10.1681/ASN.2007060692.
  35. Lu, W.; van Eerde, A.M.; Fan, X.; Quintero-Rivera, F.; Kulkarni, S.; Ferguson, H.; Kim, H.G.; Fan, Y.; Xi, Q.; Li, Q.G., et al. Disruption of ROBO2 is associated with urinary tract anomalies and confers risk of vesicoureteral reflux. *American journal of human genetics* **2007**, *80*, 616-632, doi:10.1086/512735.
  36. Krug, P.; Moriniere, V.; Marlin, S.; Koubi, V.; Gabriel, H.D.; Colin, E.; Bonneau, D.; Salomon, R.; Antignac, C.; Heidet, L. Mutation screening of the EYA1, SIX1, and SIX5 genes in a large cohort of patients harboring branchio-oto-renal syndrome calls into question the pathogenic role of SIX5 mutations. *Human mutation* **2011**, *32*, 183-190, doi:10.1002/humu.21402.
  37. Hoskins, B.E.; Cramer, C.H.; Silvius, D.; Zou, D.; Raymond, R.M.; Orten, D.J.; Kimberling, W.J.; Smith, R.J.; Weil, D.; Petit, C., et al. Transcription factor SIX5 is mutated in patients with branchio-oto-renal syndrome. *American journal of human genetics* **2007**, *80*, 800-804, doi:10.1086/513322.
  38. Hwang, D.Y.; Kohl, S.; Fan, X.; Vivante, A.; Chan, S.; Dworschak, G.C.; Schulz, J.; van Eerde, A.M.; Hilger, A.C.; Gee, H.Y., et al. Mutations of the SLIT2-ROBO2 pathway genes SLIT2 and SRGAP1 confer risk for congenital anomalies of the kidney and urinary tract. *Human genetics* **2015**, *134*, 905-916, doi:10.1007/s00439-015-1570-5.
  39. Gimelli, S.; Caridi, G.; Beri, S.; McCracken, K.; Bocciardi, R.; Zordan, P.; Dagnino, M.; Fiorio, P.; Murer, L.; Benetti, E., et al. Mutations in SOX17 are associated with congenital anomalies of the kidney and the urinary tract. *Human mutation* **2010**, *31*, 1352-1359, doi:10.1002/humu.21378.
  40. Vivante, A.; Kleppa, M.J.; Schulz, J.; Kohl, S.; Sharma, A.; Chen, J.; Shril, S.; Hwang, D.Y.; Weiss, A.C.; Kaminski, M.M., et al. Mutations in TBX18 Cause Dominant Urinary Tract Malformations via Transcriptional Dysregulation of Ureter Development. *American journal of human genetics* **2015**, *97*, 291-301, doi:10.1016/j.ajhg.2015.07.001.
  41. Li, H.; Sheridan, R.; Williams, T. Analysis of TFAP2A mutations in Branchio-Oculo-Facial Syndrome indicates functional complexity within the AP-2alpha DNA-binding domain. *Human molecular genetics* **2013**, *22*, 3195-3206, doi:10.1093/hmg/ddt173.
  42. Gbadegesin, R.A.; Brophy, P.D.; Adeyemo, A.; Hall, G.; Gupta, I.R.; Hains, D.; Bartkowiak, B.; Rabinovich, C.E.; Chandrasekharappa, S.; Homstad, A., et al. TNXB mutations can cause vesicoureteral reflux. *Journal of the American Society of Nephrology: JASN* **2013**, *24*, 1313-1322, doi:10.1681/ASN.2012121148.
  43. Saisawat, P.; Kohl, S.; Hilger, A.C.; Hwang, D.Y.; Yung Gee, H.; Dworschak, G.C.; Tasic, V.; Pennimpede, T.; Natarajan, S.; Sperry, E., et al. Whole-exome resequencing reveals recessive mutations in TRAP1 in individuals with CAKUT and VACTERL association. *Kidney international* **2014**, *85*, 1310-1317, doi:10.1038/ki.2013.417.
  44. Hernandez, O.; Way, S.; McKenna, J., 3rd; Gambello, M.J. Generation of a conditional disruption of the Tsc2 gene. *Genesis* **2007**, *45*, 101-106, doi:10.1002/dvg.20271.
  45. Hart, T.C.; Gorry, M.C.; Hart, P.S.; Woodard, A.S.; Shihabi, Z.; Sandhu, J.; Shirts, B.; Xu, L.; Zhu, H.; Barmada, M.M., et al. Mutations of the UMOD gene are responsible for medullary cystic kidney disease 2 and familial juvenile hyperuricaemic nephropathy. *Journal of medical genetics* **2002**, *39*, 882-892.
  46. Jenkins, D.; Bitner-Glindzicz, M.; Malcolm, S.; Hu, C.C.; Allison, J.; Winyard, P.J.; Gullett, A.M.; Thomas, D.F.; Belk, R.A.; Feather, S.A., et al. De novo Uroplakin IIIa heterozygous mutations cause human renal adysplasia leading to severe kidney failure. *Journal of the American Society of Nephrology: JASN* **2005**, *16*, 2141-2149, doi:10.1681/ASN.2004090776.
  47. Groenen, P.M.; Garcia, E.; Debeer, P.; Devriendt, K.; Fryns, J.P.; Van de Ven, W.J. Structure, sequence, and chromosome 19 localization of human USF2 and its rearrangement in a patient with multicystic renal dysplasia. *Genomics* **1996**, *38*, 141-148, doi:10.1006/geno.1996.0609.
  48. Vivante, A.; Mark-Danieli, M.; Davidovits, M.; Harari-Steinberg, O.; Omer, D.; Gnatek, Y.; Cleper, R.; Landau, D.; Kovalski, Y.; Weissman, I., et al. Renal hypodysplasia associates with a WNT4 variant that causes aberrant canonical WNT signaling. *Journal of the American Society of Nephrology: JASN* **2013**, *24*, 550-558, doi:10.1681/ASN.2012010097.

49. Jeanpierre, C.; Denamur, E.; Henry, I.; Cabanis, M.O.; Luce, S.; Cecille, A.; Elion, J.; Peuchmaur, M.; Loirat, C.; Niaudet, P., et al. Identification of constitutional WT1 mutations, in patients with isolated diffuse mesangial sclerosis, and analysis of genotype/phenotype correlations by use of a computerized mutation database. *American journal of human genetics* **1998**, *62*, 824-833, doi:10.1086/301806.50.
50. O'Toole, J.F.; Liu, Y.; Davis, E.E.; Westlake, C.J.; Attanasio, M.; Otto, E.A.; Seelow, D.; Nurnberg, G.; Becker, C.; Nuutinen, M., et al. Individuals with mutations in XPNPEP3, which encodes a mitochondrial protein, develop a nephronophthisis-like nephropathy. *The Journal of clinical investigation* **2010**, *120*, 791-802, doi:10.1172/JCI40076.
